# Supplementary material for: Optimizing adsorption refrigeration with MOF-propane integration: a sustainable approach
Source: Royal Society of Chemistry journal article supplement (doi:10.1039/d4ta03001j), 2024-01-01
Supplement: d4ta03001j1.pdf [file d4ta03001j1.pdf]

# Supplementary Information for Optimizing Adsorption Refrigeration with MOF-Propane Integration: A Sustainable Approach

S Muthu Krishnan,<sup>†</sup> Riya Sharma,<sup>†</sup> and Jayant K. Singh<sup>\*,†,‡</sup>

<sup>†</sup>*Department of Chemical Engineering, Indian Institute of Technology Kanpur, Uttar  
Pradesh, 208016, India*

<sup>‡</sup>*Prescience Insilico Private Limited, 5th Floor, Novel MSR Building, Marathalli,  
Bengaluru, Karnataka, 560037, India.*

E-mail: jayantks@iitk.ac.in

Phone: +91 (0)512 2596141. Fax: +91-512-2590104

## Contents

|                                                 |           |
|-------------------------------------------------|-----------|
| <b>S1 Theory</b>                                | <b>iv</b> |
| S1.1 Adsorption Refrigeration Cycle . . . . .   | iv        |
| S1.1.1 Isosteric Heating (I - II) . . . . .     | iv        |
| S1.1.2 Isobaric Desorption (II - III) . . . . . | v         |
| S1.1.3 Isosteric Cooling (III - IV) . . . . .   | v         |
| S1.1.4 Isobaric Adsorption (IV - I) . . . . .   | v         |

|                                                                                       |             |
|---------------------------------------------------------------------------------------|-------------|
| S1.2 Thermodynamic Modelling . . . . .                                                | vi          |
| Figure: A schematic representation of the adsorption refrigeration (AR) cycle         | vi          |
| Table: Operating condition for the adsorption refrigeration cycle used in this        |             |
| work . . . . .                                                                        | viii        |
| Table: Operating condition for the evaporator and heat exchanger used in              |             |
| this work . . . . .                                                                   | viii        |
| <b>S2 COP of the top 20 MOFs</b>                                                      | <b>ix</b>   |
| S2.1 Best MOFs . . . . .                                                              | ix          |
| Table: $COP_R$ of the best MOFs. . . . .                                              | ix          |
| <b>S3 Cooling Capacity(CC)</b>                                                        | <b>x</b>    |
| Table: Best MOFs ranked according to cooling capacity . . . . .                       | x           |
| <b>S4 Pearson Correlation Matrix</b>                                                  | <b>xi</b>   |
| Figure: Pearson Correlation Matrix for COP and properties of a MOF. . . . .           | xi          |
| Figure: Pearson Correlation Matrix for CC and properties of a MOF. . . . .            | xi          |
| <b>S5 Heat Capacity Calculation for MOFs</b>                                          | <b>xiii</b> |
| Figure: $C_p$ of MOFs as predicted by machine learning model, <sup>1</sup> colored by |             |
| percentage change in COP. . . . .                                                     | xiii        |
| Figure: COP before and after $C_p$ calculations, colored by percentage change         |             |
| in COP. . . . .                                                                       | xiii        |
| <b>S6 Optimized Results</b>                                                           | <b>xv</b>   |
| Table: Comparison of COP before and after optimization, ranked by their               |             |
| optimized COP. . . . .                                                                | xv          |
| Table: Comparison of CC before and after optimization, ranked by their opti-          |             |
| mized cooling capacity. . . . .                                                       | xv          |

**S7 Comparison of cooling capacities**

**xvii**

Table: Comparison of Cooling Capacity obtained in this work with the literature values . . . . . xvii

# S1 Theory

## S1.1 Adsorption Refrigeration Cycle

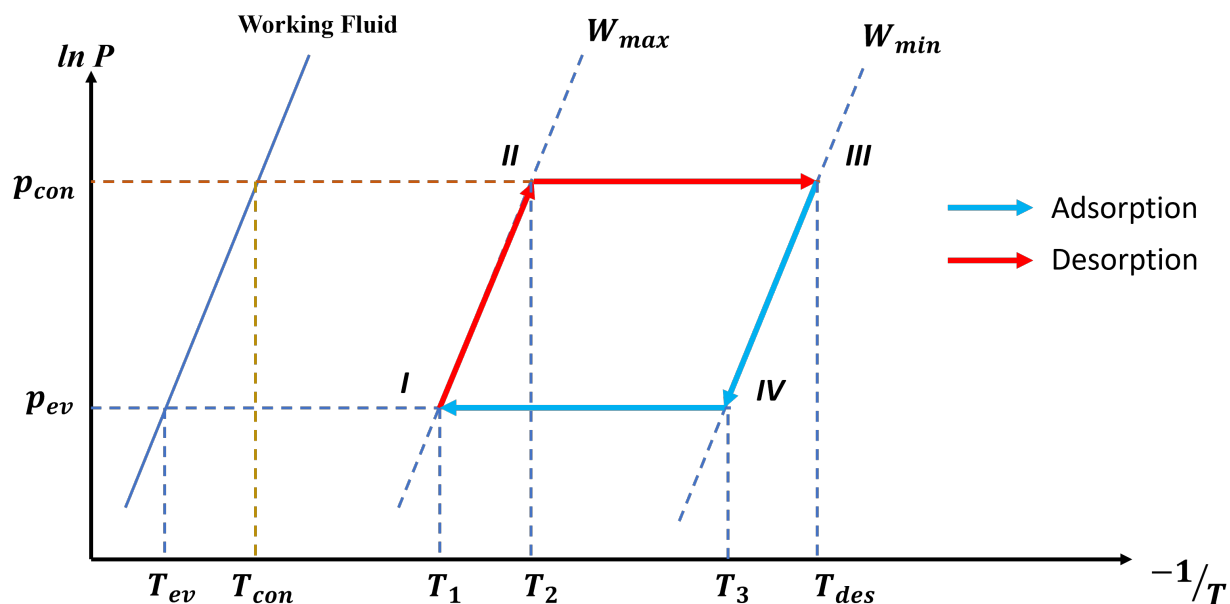

Fig. S1: Representation of an adsorption refrigeration cycle, following Clausius Clapeyron equation.  $T_{ev}$  and  $T_{con}$  are the operating temperatures of the evaporator and the condenser respectively,  $T_1$  is the operating temperature of the adsorbent bed,  $T_{des}$  is the desorption temperature.  $T_2$  is the minimal desorption or maximal pre-heating temperature calculated by the Trouton's rule.

An adsorption refrigeration cycle goes through 4 stages (i) I - II Isosteric Heating (ii) II - III Isobaric Desorption (iii) III - IV Isosteric Cooling (iv) IV - I Isobaric Adsorption.

### S1.1.1 Isosteric Heating (I - II)

At point, I, the adsorbent bed achieves full adsorption at a temperature of  $T_1 = T_{ads}$ , corresponding to the ambient temperature at which the adsorbent bed is maintained. In practical conditions,  $T_{con} = T_1 = T_{ads}$ , and the uptake at this condition is denoted by  $W_{max}$ . Subsequently, the adsorbent bed is disengaged from the evaporator and condenser, undergoing constant heating until the pressure within the bed reaches  $p_{con}$ , which is depicted

as point II. At this juncture, the adsorbent bed attains a temperature of  $T_2$  and a pressure of  $p_{con}$ . The energy required for heating is represented as  $Q_1$ . The determination of  $T_2$  involves the application of Trouton's rule.<sup>2</sup>

$$T_{con}^2 = (T_2 * T_{ev}) \quad (1)$$

### S1.1.2 Isobaric Desorption (II - III)

The adsorbent bed, under continuous heating, is coupled with the condenser. Heating is continued until the temperature within the adsorbent bed reaches  $T_{des}$ . The energy input for this heating process is quantified by  $Q_2$ . Concurrently, the desorbed refrigerant gas is directed to the condenser, leading to a reduction in uptake from  $W_{max}$  to  $W_{min}$ . When the system reaches point III the adsorbent bed is at a temperature  $T_{des}$  and pressure  $p_{con}$  exhibiting an uptake of  $W_{min}$ . At III, the adsorbent bed is completely desorbed. The refrigerant goes into the condenser, where it condenses, and is stored in the refrigerant tank.

### S1.1.3 Isosteric Cooling (III - IV)

Once the adsorbent bed has been cooled down, it becomes ready for adsorption when the internal pressure reaches  $p_{ev}$ , the operational pressure of the evaporator; the accompanying energy release in this stage is denoted as  $Q_3$ . The adsorbent bed is then kept isolated by disconnecting it from the condenser and the evaporator and allowed to cool down until it reaches point IV. This cooling process occurs at a constant uptake of  $W_{min}$ .

### S1.1.4 Isobaric Adsorption (IV - I)

During this phase, the refrigerant gas undergoes the adsorption process within the connected adsorbent bed linked to the evaporator. The adsorbent bed gradually captures the refrigerant gas, releasing heat and consequently cooling the adsorbent bed. The energy liberated in this stage is given by  $Q_4$ . When the system reaches point I, the adsorbent bed is at a temperature

of  $T_{ads}$  and a pressure of  $p_{ev}$  with an uptake of  $W_{max}$ .

## S1.2 Thermodynamic Modelling

The efficiency of this cycle is determined by calculating the coefficient of performance (COP). The same cycle can be used to describe the adsorption heat pump and adsorption refrigeration cycles. The only difference is the direction of heat transfer. The COP of the two cycles can be given by.<sup>2-4</sup>

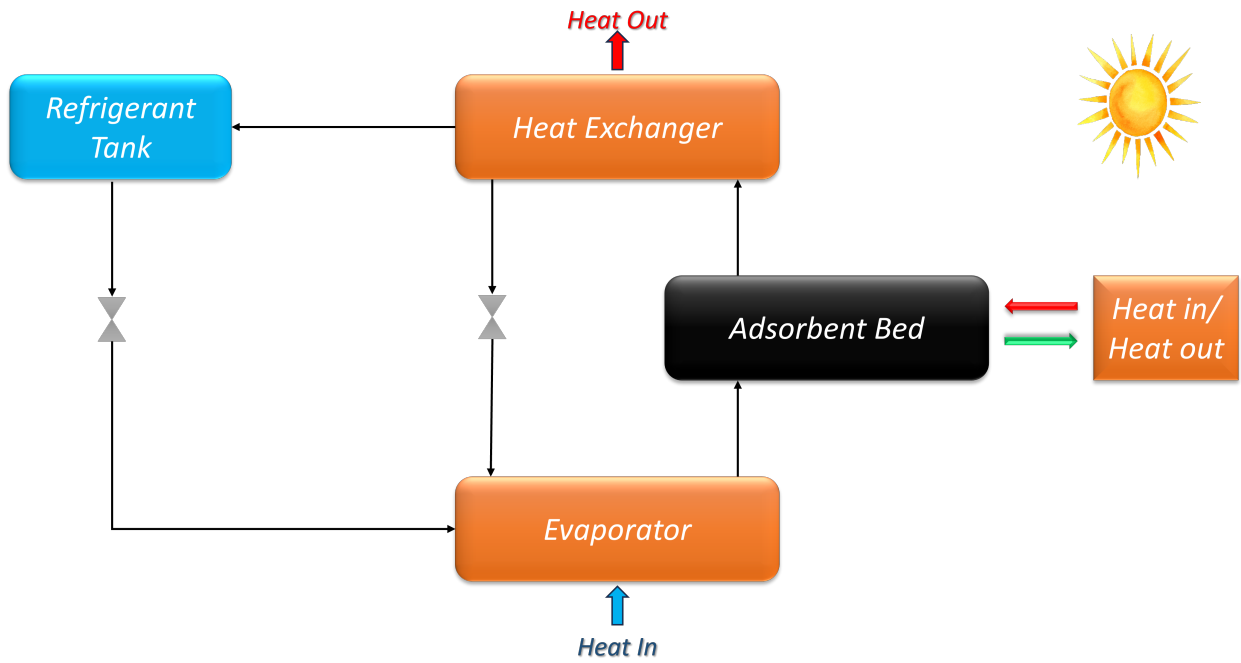

Fig. S2: A schematic representation of the adsorption refrigeration (AR) cycle

$$COP_H = \frac{-(Q_{con} + Q_{ads})}{Q_{reg}} \quad (2)$$

$$COP_R = \frac{Q_{ev}}{Q_{reg}} \quad (3)$$

Where  $Q_{con}$  is the energy released during condensation,  $Q_{ads}$  is the energy released during the adsorption stage, both are negative as energy is released.  $Q_{reg}$  is the energy required to

regenerate the fully adsorbed adsorbent bed. This is given by,<sup>3</sup>

$$Q_{reg} = Q_1 + Q_2 - Q_{sorption} \quad (4)$$

where  $Q_1$  is energy required for heating from I-II,  $Q_2$  is the energy required for heating from II-III and  $Q_{sorption}$  is the energy released during the adsorption of the working fluid.

The energies represented in terms of measurable quantities like uptake  $W$ , heat of adsorption  $\Delta H_{ads}$ , heat capacity  $C_p$ , and the density of the working fluid  $\rho_{liq}^{wf}$  are given by,<sup>2,5</sup>

$$Q_1 = m_{sorbent} C_p^{sorbent} (T_2 - T_1) + m_{sorbent} q_{max} C_p^{wf} (T_2 - T_1) \quad (5)$$

$$Q_2 = m_{sorbent} C_p^{sorbent} (T_{des} - T_2) + m_{sorbent} \frac{q_{max} + q_{min}}{2} C_p^{wf} (T_{des} - T_2) \quad (6)$$

$$Q_{sorption} = \frac{m_{sorbent} \Delta q < \Delta H_{ads} >}{M_w} \quad (7)$$

where  $q$  the uptake is given by Gurvich rule<sup>5</sup> as,

$$q = W \rho_{liq}^{wf} \quad (8)$$

$Q_{ev}$  the energy taken from the evaporator is given by,<sup>3</sup>

$$Q_{ev} = - \frac{m_{sorbent} \Delta H_{vap}(T_{ev}) \Delta q}{M_w} \quad (9)$$

$Q_{con}$  the energy released to the condenser is given by,<sup>3</sup>

$$Q_{con} = \frac{m_{sorbent} \Delta H_{vap}(T_{con}) \Delta q}{M_w} \quad (10)$$

Now the final equation for the  $COP_R$  for the adsorption refrigeration cycle will be,

$$COP_R = \frac{\frac{m_{sorbent} \Delta H_{vap}(T_{ev}) \Delta q}{M_w}}{m_{sorbent} C_p^{sorbent} (T_{des} - T_1) + m_{sorbent} q_{max} C_p^{wf} (T_2 - T_1) + m_{sorbent} \frac{q_{max} + q_{min}}{2} C_p^{wf} (T_{des} - T_2) - \frac{m_{sorbent} \Delta q < \Delta H_{ads} >}{M_w}} \quad (11)$$

When we ignore the heat capacity of the condenser, the simplified equation will turn out to be,<sup>2,4</sup>

$$COP_R = \frac{\frac{\Delta H_{vap}(T_{ev}) \Delta q}{M_w}}{C_p^{sorbent} (T_{des} - T_1) - \frac{\Delta q < \Delta H_{ads} >}{M_w}} \quad (12)$$

Here the  $C_p^{sorbent}$  is assumed to be constant at  $1 \text{ kJ/kg.K}$ .  $\Delta H_{vap}$  is taken from NIST.<sup>6</sup>

Table. S1: Operating condition for the adsorption refrigeration cycle used in this work

| <b>Propane (R-290)</b> | <b>T(K)</b> | <b>P(bar)</b> |
|------------------------|-------------|---------------|
| Adsorption             | 313.15      | 4.7446        |
| Desorption             | 358.15      | 10.790        |

Table. S2: Operating condition for the evaporator and heat exchanger used in this work

| <b>Operation</b>         | <b>T(K)</b> |
|--------------------------|-------------|
| Evaporator               | 273.15      |
| Condenser/Heat Exchanger | 303.15      |



## S2 COP of the top 20 MOFs

### S2.1 Best MOFs

A list of best MOFs with their calculated properties is given in table S3.

Table. S3:  $COP_R$  of the best MOFs.

| Rank | MOF       | $q_{max}(g/g)$    | $\langle H_{ads} \rangle$<br>(kJ/mol) | $\Delta q(g/g)$ | Metal<br>atom | $COP_R$ |
|------|-----------|-------------------|---------------------------------------|-----------------|---------------|---------|
| 1    | XUKYEI    | $0.92 \pm 0.017$  | $-19.97 \pm 1.1$                      | 0.252           | Cu            | 0.596   |
| 2    | QIYDAF01  | $0.827 \pm 0.001$ | $-19.16 \pm 1.55$                     | 0.166           | Cu            | 0.533   |
| 3    | XAHPIH    | $0.818 \pm 0.011$ | $-20.753 \pm 1.4$                     | 0.184           | Cu            | 0.526   |
| 4    | VETMIS    | $0.929 \pm 0.003$ | $-20.953 \pm 0.929$                   | 0.181           | Cu            | 0.520   |
| 5    | CUSXIY    | $0.7 \pm 0.016$   | $-17.19 \pm 0.67$                     | 0.128           | Zn            | 0.506   |
| 6    | REZXUQ    | $0.729 \pm 0.009$ | $-20.01 \pm 0.523$                    | 0.154           | Cr            | 0.503   |
| 7    | ZELROZ    | $0.623 \pm 0.018$ | $-18.18 \pm 0.707$                    | 0.125           | Zn            | 0.487   |
| 8    | LEJCEK    | $0.765 \pm 0.008$ | $-19.95 \pm 0.953$                    | 0.138           | Zn            | 0.483   |
| 9    | CUSXOE    | $0.80 \pm 0.001$  | $-16.83 \pm 0.67$                     | 0.114           | Zn            | 0.483   |
| 10   | ALEJAE    | $0.805 \pm 0.036$ | $-17.42 \pm 0.564$                    | 0.116           | In            | 0.480   |
| 11   | BAZFUF    | $0.94 \pm 0.006$  | $-23.34 \pm 0.765$                    | 0.177           | Cu            | 0.479   |
| 12   | ACOCUS    | $0.899 \pm 0.001$ | $-21.12 \pm 0.66$                     | 0.148           | Zn            | 0.479   |
| 13   | ADATAC    | $0.837 \pm 0.009$ | $-20.43 \pm 0.3$                      | 0.139           | Zn            | 0.478   |
| 14   | BAZFUF01  | $0.937 \pm 0.006$ | $-23.67 \pm 0.765$                    | 0.177           | Cu            | 0.475   |
| 15   | ALULEZ    | $0.590 \pm 0.010$ | $-19.9 \pm 1.03$                      | 0.131           | Ce            | 0.473   |
| 16   | c6ce00407 | $0.743 \pm 0.005$ | $-19.7 \pm 0.49$                      | 0.128           | Cu            | 0.471   |
| 17   | ACOCOM    | $0.869 \pm 0.001$ | $-20.64 \pm 0.53$                     | 0.136           | Cu            | 0.471   |
| 18   | BAZGEQ    | $0.767 \pm 0.004$ | $-20.11 \pm 1.73$                     | 0.131           | Cu            | 0.470   |
| 19   | XAHPED    | $0.773 \pm 0.010$ | $-22.15 \pm 0.835$                    | 0.148           | Cu            | 0.467   |
| 20   | AVAKEP    | $0.789 \pm 0.024$ | $-16.85 \pm 0.99$                     | 0.106           | Cu            | 0.466   |

### S3 Cooling Capacity(CC)

Top 20 MOFs ranked according to their cooling capacities.

Table. S4: Best MOFs ranked according to cooling capacity

| Rank | MOF      | $\Delta q$ (g/g) | $COP_R$ | CC (kJ/kg) |
|------|----------|------------------|---------|------------|
| 1    | XUKYEI   | 0.252            | 0.595   | 94.98      |
| 2    | XAHPIH   | 0.184            | 0.525   | 69.24      |
| 3    | VETMIS   | 0.181            | 0.520   | 68.38      |
| 4    | BAZFUF01 | 0.177            | 0.475   | 66.78      |
| 5    | BAZFUF   | 0.177            | 0.479   | 66.69      |
| 6    | QIYDAF01 | 0.166            | 0.533   | 62.64      |
| 7    | VAGMEX   | 0.162            | 0.457   | 60.919     |
| 8    | EDUVOO   | 0.1606           | 0.459   | 60.37      |
| 9    | XAFFER   | 0.159            | 0.446   | 59.94      |
| 10   | NATKIF   | 0.158            | 0.451   | 59.67      |
| 11   | XAFFOB   | 0.157            | 0.434   | 59.3       |
| 12   | XAFFIV   | 0.156            | 0.440   | 58.89      |
| 13   | REZXUQ   | 0.153            | 0.503   | 57.88      |
| 14   | AWUPAL   | 0.150            | 0.435   | 56.44      |
| 15   | XAHPED   | 0.148            | 0.467   | 55.94      |
| 16   | VAGMAT   | 0.147            | 0.422   | 55.58      |
| 17   | ACOCUS   | 0.147            | 0.479   | 55.47      |
| 18   | KUVMIZ   | 0.147            | 0.453   | 55.42      |
| 19   | XAFFAN   | 0.145            | 0.421   | 54.65      |
| 20   | AWUPOZ   | 0.144            | 0.431   | 54.48      |

## S4 Pearson Correlation Matrix

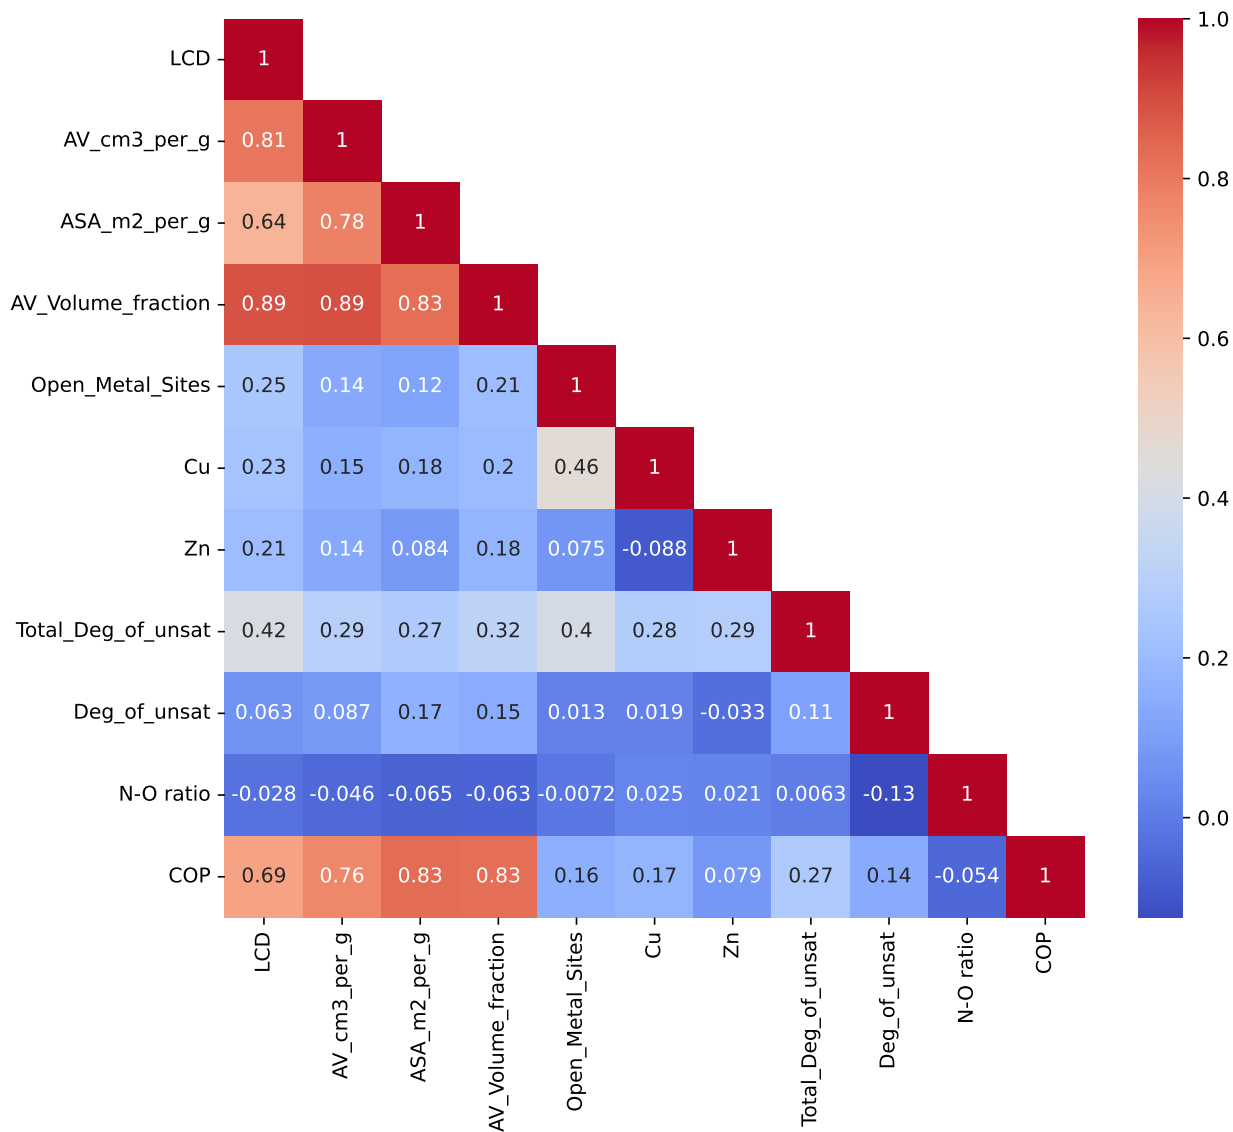

Fig. S3: Pearson Correlation Matrix for COP and properties of a MOF.

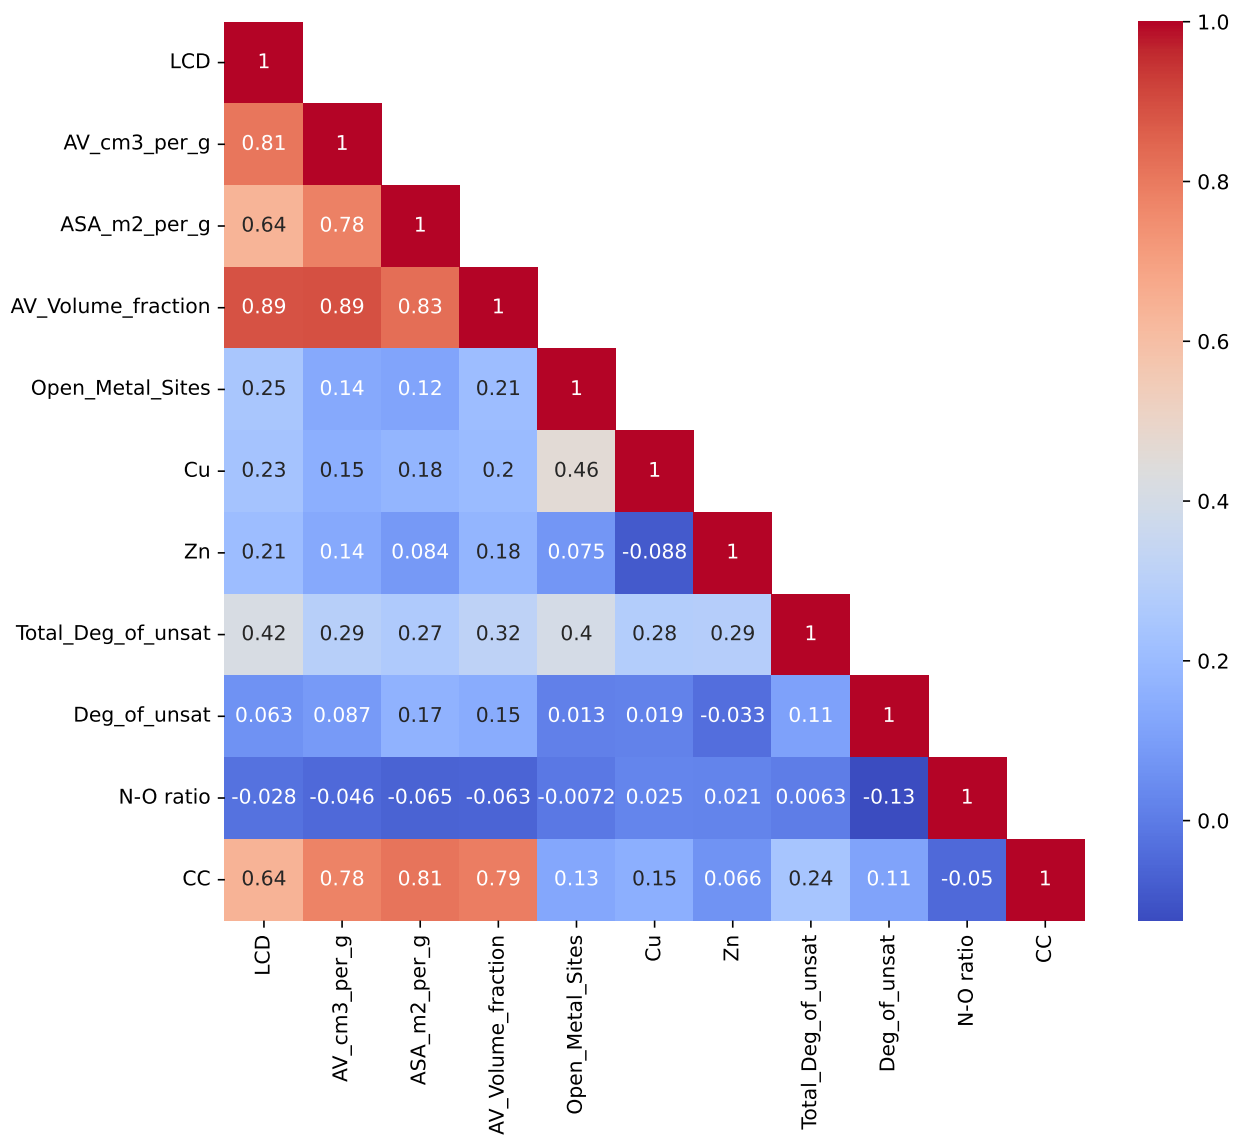

Fig. S4: Pearson Correlation Matrix for CC and properties of a MOF.

## S5 Heat Capacity Calculation for MOFs

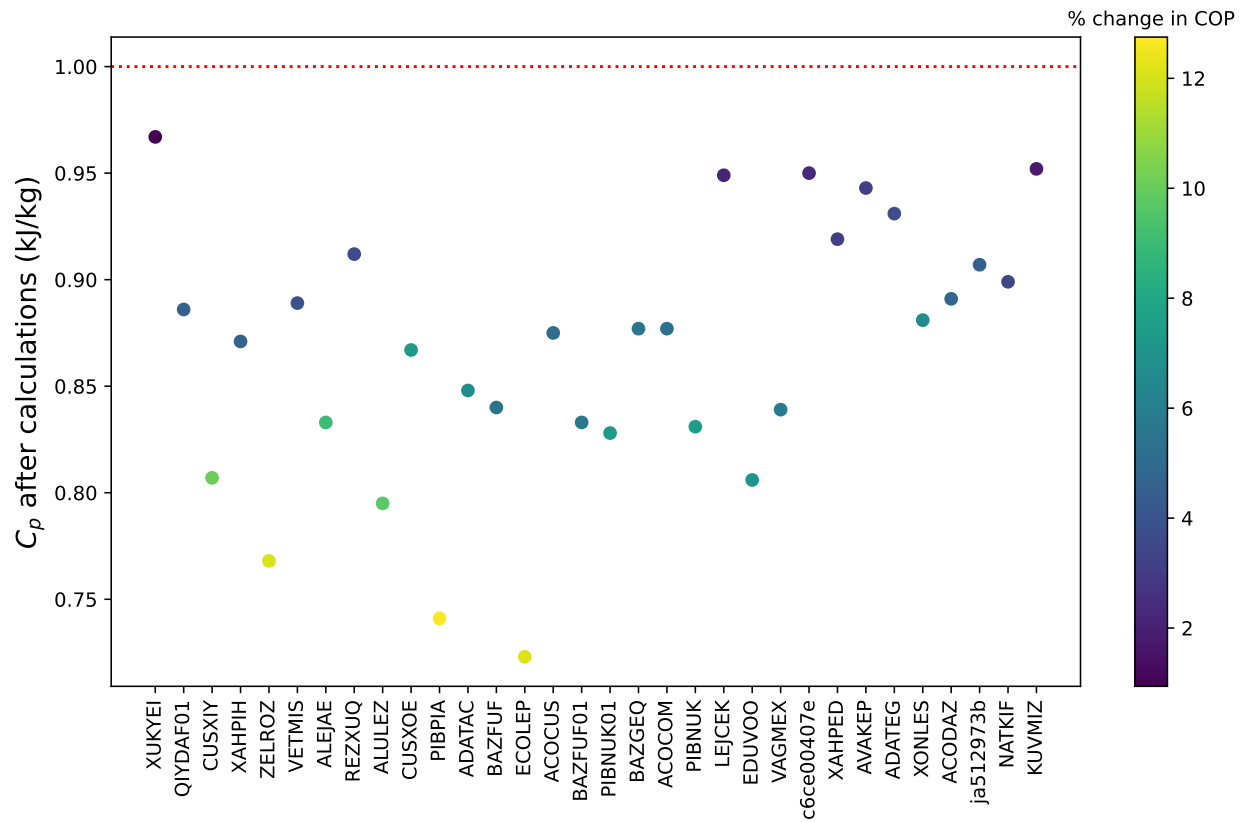

Fig. S5: C<sub>p</sub> of MOFs as predicted by machine learning model,<sup>1</sup> colored by percentage change in COP.

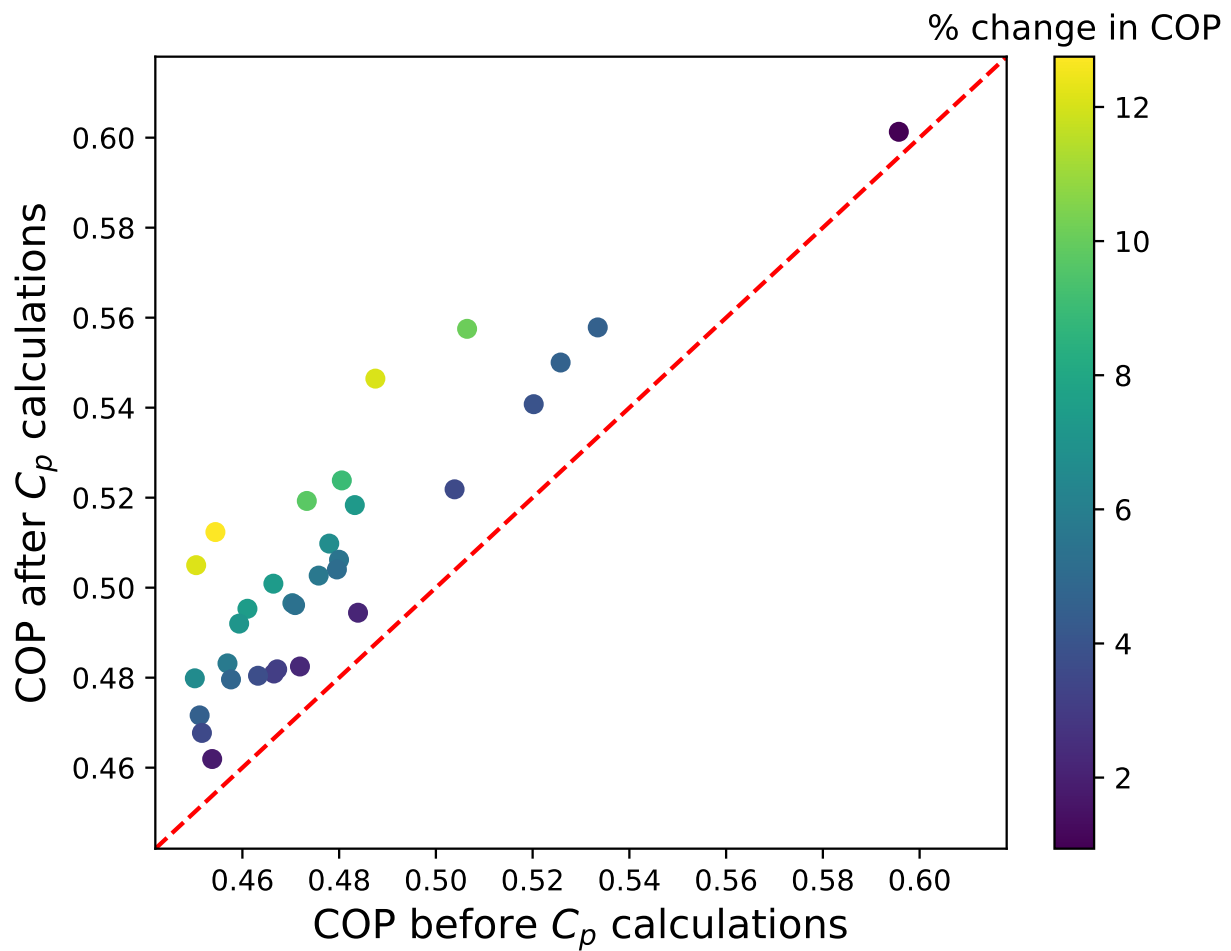

Fig. S6: COP before and after  $C_p$  calculations, colored by percentage change in COP.

## S6 Optimized Results

The COP and CC after optimization of the cycle are given in the table below.

Table. S5: Comparison of COP before and after optimization, ranked by their optimized COP.

| MOF        | $C_p$ (kJ/kg K) | COP (before) | COP (after) | % change |
|------------|-----------------|--------------|-------------|----------|
| CUSXIY     | 0.81            | 0.51         | 0.72        | 43.08    |
| ALEJAE     | 0.83            | 0.48         | 0.69        | 44.15    |
| c6ce00407e | 0.95            | 0.47         | 0.68        | 43.9     |
| ADATEG     | 0.93            | 0.46         | 0.68        | 46.38    |
| XUKYEI     | 0.97            | 0.6          | 0.68        | 13.73    |
| AVAKEP     | 0.94            | 0.47         | 0.68        | 45.19    |
| QIYDAF01   | 0.89            | 0.53         | 0.66        | 24.35    |
| ZELROZ     | 0.77            | 0.49         | 0.65        | 33.05    |
| XONLES     | 0.88            | 0.45         | 0.62        | 38.55    |
| VETMIS     | 0.89            | 0.52         | 0.62        | 18.81    |
| REZXUQ     | 0.91            | 0.5          | 0.62        | 22.33    |
| ALULEZ     | 0.8             | 0.47         | 0.61        | 29.91    |
| ADATAC     | 0.85            | 0.48         | 0.61        | 26.92    |
| PIBPIA     | 0.74            | 0.45         | 0.6         | 31.27    |
| BAZGEQ     | 0.88            | 0.47         | 0.59        | 26.46    |
| LEJCEK     | 0.95            | 0.48         | 0.59        | 22.27    |
| EDUVOO     | 0.81            | 0.46         | 0.59        | 27.62    |
| PIBNUK     | 0.83            | 0.46         | 0.58        | 26.09    |
| BAZFUF     | 0.84            | 0.48         | 0.58        | 20.45    |
| ACOCUS     | 0.88            | 0.48         | 0.58        | 20.03    |
| ECOLEP     | 0.72            | 0.45         | 0.57        | 27.58    |

Table. S6: Comparison of CC before and after optimization, ranked by their optimized cooling capacity.

| MOF        | CC (kJ/kg) (before) | CC (kJ/kg) (after) | % change |
|------------|---------------------|--------------------|----------|
| XUKYEI     | 94.98               | 190.2              | 100.24   |
| VETMIS     | 68.38               | 149.97             | 119.31   |
| BAZFUF     | 66.7                | 147.74             | 121      |
| QIYDAF01   | 62.64               | 146.63             | 134.07   |
| BAZFUF01   | 66.79               | 146.03             | 118.66   |
| CUSXIY     | 48.02               | 134.09             | 179.23   |
| ECOLEP     | 51.97               | 133.53             | 156.93   |
| VAGMEX     | 60.92               | 132.65             | 117.74   |
| c6ce00407e | 48.4                | 132.04             | 172.81   |
| ALEJAE     | 43.71               | 131.95             | 201.89   |
| REZXUQ     | 57.88               | 131.08             | 126.46   |
| AVAKEP     | 39.93               | 129.34             | 223.9    |
| ADATEG     | 40.17               | 128.92             | 220.9    |
| NATKIF     | 59.68               | 128.63             | 115.54   |
| ADATAC     | 52.34               | 124.28             | 137.43   |
| CUSXOE     | 42.69               | 121.76             | 185.2    |
| XAHPED     | 55.95               | 121.16             | 116.56   |
| ACOCUS     | 55.48               | 120.45             | 117.11   |
| LEJCEK     | 52.16               | 119.85             | 129.79   |
| KUVMIZ     | 55.42               | 117.89             | 112.71   |
| BAZGEQ     | 49.3                | 117.64             | 138.61   |



## S7 Comparison of cooling capacities

Here, we have compared the cooling capacity obtained in our work with the literature values.

Table. S7: Comparison of Cooling Capacity obtained in this work with the literature values

| Pair                                 | $T_{ev}(K)$ | $\Delta q(g/g)$ | CC (kJ/kg) | COP  | References |
|--------------------------------------|-------------|-----------------|------------|------|------------|
| Refrigerant: Alcohols/water/ammonia  |             |                 |            |      |            |
| LiBr-Silica/ethanol                  | 278         |                 | 200        | 0.55 | 7          |
| AC/ethanol                           | 278         |                 | 205        | 0.54 | 7          |
| SUKYIH/Ethanol                       | 283         | 0.9             | 826.35     | 0.96 | 4          |
| ANUGIA/Ethanol                       | 283         | 0.82            | 752.90     | 0.91 | 4          |
| AC/methanol                          | 278         |                 | 200        | 0.59 | 7          |
| Zeolite/methanol                     | 278         |                 | 180        | 0.55 | 7          |
| AC-35/methanol                       | 270         |                 | 239.15     |      | 8          |
| G-32-H/methanol                      | 270         |                 | 236.83     |      | 8          |
| Cr-MIL-101/Water                     | 283         | 0.143           | 322.94     |      | 9          |
| AC/Ammonia                           | 273         |                 | 108.65     |      | 10         |
| Refrigerant: Alchols/ water/ ammonia |             |                 |            |      |            |
| XUKYEI/Propane                       | 273         | 0.51            | 190.2      | 0.68 | This work  |
| CUSXIY/Propane                       | 273         | 0.36            | 134.09     | 0.72 | This work  |
| NU-1000/Propane                      | 278         | 0.37            | 141.805    |      | 11         |
| NU-1003/Propane                      | 278         | 0.4             | 153.30     |      | 11         |
| NU1000/Isobutane                     | 278         | 0.4             | 181.42     |      | 11         |
| NU-1003/Isobutane                    | 278         | 0.69            | 312.96     |      | 11         |
| AC/Isobutane                         | 278         |                 | 15         |      | 12         |
| MIL101/Isobutane                     | 278         |                 | 45         |      | 12         |

As shown in the table, only the cooling capacities of the MOF-ethanol pair from Li et al.<sup>4</sup> have exceeded 500 kJ/kg. Generally, working pairs with ethanol, methanol, or water tend to exhibit higher cooling capacities due to their enthalpies of vaporization being nearly three times that of propane or isobutane.

As previously mentioned, the use of alcohols as refrigerants requires meticulous maintenance of vacuum conditions due to their hypobaric vapor pressure,<sup>4,12,13</sup> complicating the practical application of adsorption refrigeration cycles. In contrast, alkane-based refrigerants, with their hyperbaric vapor pressures, facilitate easier implementation in practical applications.

## References

- (1) Moosavi, S. M.; Novotny, B. Á.; Ongari, D.; Moubarak, E.; Asgari, M.; Kadioğlu, Ö.; Charalambous, C.; Ortega-Guerrero, A.; Farmahini, A. H.; Sarkisov, L.; Garcia, S.; Noé, F.; Smit, B. A data-science approach to predict the heat capacity of nanoporous materials. *Nature Materials* **2022**, *21*, 1419–1425, DOI: 10.1038/s41563-022-01374-3.
- (2) Nguyen, B. T.; Nguyen, H. L.; Nguyen, T. C.; Cordova, K. E.; Furukawa, H. High Methanol Uptake Capacity in Two New Series of Metal–Organic Frameworks: Promising Materials for Adsorption-Driven Heat Pump Applications. *Chemistry of Materials* **2016**, *28*, 6243–6249, DOI: 10.1021/acs.chemmater.6b02431.
- (3) de Lange, M. F.; Verouden, K. J. F. M.; Vlugt, T. J. H.; Gascon, J.; Kapteijn, F. Adsorption-Driven Heat Pumps: The Potential of Metal–Organic Frameworks. *Chemical Reviews* **2015**, *115*, 12205–12250, DOI: 10.1021/acs.chemrev.5b00059, PMID: 26492978.
- (4) Li, W.; Xia, X.; Cao, M.; Li, S. Structure–property relationship of metal–organic frameworks for alcohol-based adsorption-driven heat pumps via high-throughput computational screening. *J. Mater. Chem. A* **2019**, *7*, 7470–7479, DOI: 10.1039/C8TA07909A.
- (5) Farmahini, A. H.; Limbada, K.; Sarkisov, L. Comment on the applicability of the Gurvich rule for estimation of pore volume in microporous zeolites. *Adsorption* **2022**, *28*, DOI: 10.1007/s10450-022-00364-w.
- (6) Linstrom, P. J.; Mallard, W. G. The NIST Chemistry WebBook: A Chemical Data Resource on the Internet. *Journal of Chemical & Engineering Data* **2001**, *46*, 1059–1063, DOI: 10.1021/je000236i.
- (7) Freni, A.; Maggio, G.; Sapienza, A.; Frazzica, A.; Restuccia, G.; Vasta, S. Comparative analysis of promising adsorbent/adsorbate pairs for adsorptive heat pumping, air

- conditioning and refrigeration. *Applied Thermal Engineering* **2016**, *104*, 85–95, DOI: <https://doi.org/10.1016/j.applthermaleng.2016.05.036>.
- (8) Hadj Ammar, M.; Benhaoua, B.; Bouras, F. Thermodynamic analysis and performance of an adsorption refrigeration system driven by solar collector. *Applied Thermal Engineering* **2017**, *112*, 1289–1296, DOI: <https://doi.org/10.1016/j.applthermaleng.2016.09.119>.
- (9) Canivet, J.; Fateeva, A.; Guo, Y.; Coasne, B.; Farrusseng, D. Water adsorption in MOFs: fundamentals and applications. *Chem. Soc. Rev.* **2014**, *43*, 5594–5617, DOI: [10.1039/C4CS00078A](https://doi.org/10.1039/C4CS00078A).
- (10) Critoph, R. An ammonia carbon solar refrigerator for vaccine cooling. *Renewable Energy* **1994**, *5*, 502–508, DOI: [https://doi.org/10.1016/0960-1481\(94\)90424-3](https://doi.org/10.1016/0960-1481(94)90424-3), Climate change Energy and the environment.
- (11) Chen, H.; Chen, Z.; Farha, O. K.; Snurr, R. Q. High Propane and Isobutane Adsorption Cooling Capacities in Zirconium-Based Metal–Organic Frameworks Predicted by Molecular Simulations. *ACS Sustainable Chemistry & Engineering* **2019**, *7*, 18242–18246, DOI: [10.1021/acssuschemeng.9b05368](https://doi.org/10.1021/acssuschemeng.9b05368).
- (12) Ma, L.; Yang, H.; Wu, Q.; Yin, Y.; Liu, Z.; Cui, Q.; Wang, H. Study on adsorption refrigeration performance of MIL-101-isobutane working pair. *Energy* **2015**, *93*, 786–794, DOI: <https://doi.org/10.1016/j.energy.2015.09.097>.
- (13) García, E. J.; Bahamon, D.; Vega, L. F. Systematic Search of Suitable Metal–Organic Frameworks for Thermal Energy-Storage Applications with Low Global Warming Potential Refrigerants. *ACS Sustainable Chemistry & Engineering* **2021**, *9*, 3157–3171, DOI: [10.1021/acssuschemeng.0c07797](https://doi.org/10.1021/acssuschemeng.0c07797).
